# Supplementary material
Source: PubMed Central journal article supplement (PMC5053786)
Supplement: CJN.01520216SupplementaryData.pdf [file CJN.01520216SupplementaryData.pdf]

**Supplementary Table 1. Baseline characteristics by quintiles of animal protein to potassium ratio**

|                                 | HPFS       |            | NHS I      |            | NHS II     |            |
|---------------------------------|------------|------------|------------|------------|------------|------------|
|                                 | Quintile 1 | Quintile 5 | Quintile 1 | Quintile 5 | Quintile 1 | Quintile 5 |
| APKR, g/mEq                     | 0.43(0.09) | 1.06(0.18) | 0.44(0.08) | 0.98(0.15) | 0.45(0.11) | 1.11(0.17) |
| Age, years                      | 55.9(10.0) | 53.4(9.6)  | 54.5(7.0)  | 51.8(7.1)  | 37.4(4.6)  | 36.0(4.7)  |
| BMI, kg/mq                      | 24.7(3.1)  | 26.0(3.5)  | 24.3(4.3)  | 26.0(5.2)  | 23.1(4.3)  | 25.4(5.8)  |
| History of diabetes, %          | 2          | 3          | 2          | 4          | 1          | 1          |
| History of hypertension, %      | 21         | 22         | 24         | 25         | 6          | 7          |
| Thiazide use, %                 | 8          | 9          | 14         | 14         | 2          | 2          |
| Calcium supplements use, %      | 31         | 21         | 61         | 55         | 37         | 32         |
| Dietary calcium, mg/day         | 796(289)   | 754(298)   | 681(222)   | 688(256)   | 823(261)   | 899(333)   |
| Supplemental calcium, mg/day    | 144(317)   | 85.1(246)  | 402(453)   | 341(428)   | 165(317)   | 116(256)   |
| Magnesium, mg/day               | 422(105)   | 322(70)    | 335(82)    | 276(63)    | 369(95)    | 294(68)    |
| Fructose, g/day                 | 35.6(14.5) | 21.1(9.8)  | 28.3(10.9) | 17.8(8.2)  | 30.6(12.7) | 19.8(10.7) |
| Oxalate, mg/day                 | 198(234)   | 121(109)   | 148(129)   | 103(81)    | 204(190)   | 109(88)    |
| Phytate, mg/day                 | 1,337(612) | 774(274)   | 907(393)   | 592(200)   | 1,029(343) | 682(182)   |
| Alcohol intake, g/day           | 10.6(16.0) | 10.8(14.9) | 6.5(11.7)  | 5.9(10.6)  | 3.9(7.5)   | 2.5(5.3)   |
| Fluid intake, L/day             | 2.0(0.8)   | 1.8(0.8)   | 2.1(0.7)   | 1.9(0.7)   | 2.2(0.9)   | 2.0(0.8)   |
| Dairy protein, g/day            | 13.4(8.2)  | 15.7(9.4)  | 12.4(6.6)  | 15.3(8.5)  | 15.1(7.8)  | 19.8(10.0) |
| Non-dairy animal protein, g/day | 30.4(12.4) | 65.6(18.5) | 31.9(9.8)  | 59.9(15.1) | 28.7(12.5) | 59.7(15.8) |
| Vegetable protein, g/day        | 32.3(8.6)  | 21.5(4.6)  | 24.3(5.2)  | 17.7(3.5)  | 29.1(7.2)  | 19.9(3.8)  |
| Dietary potassium, mg/day       | 3,988(793) | 3,056(534) | 3,395(653) | 2,696(480) | 3,357(655) | 2,696(464) |

Values are means(SD) or percentages.

**Supplementary Table 2. Quintiles of vegetable protein intake and risk of kidney stones**

|                          | <b>Quintile 1</b> | <b>Quintile 2</b> | <b>Quintile 3</b> | <b>Quintile 4</b> | <b>Quintile 5</b> | <b>p-value for trend</b> |
|--------------------------|-------------------|-------------------|-------------------|-------------------|-------------------|--------------------------|
| <b>HPFS</b>              |                   |                   |                   |                   |                   |                          |
| Median (g/day)           | 18.8              | 21.6              | 24.2              | 27.1              | 32.3              |                          |
| Range                    | < 20.0            | 20.0, 22.9        | 23.0, 25.5        | 25.6, 29.1        | > 29.1            |                          |
| Cases                    | 408               | 454               | 417               | 363               | 321               |                          |
| Person-time              | 132,151           | 133,570           | 134,896           | 134,499           | 134,370           |                          |
| Age-adjusted HR          | 1.00 (Ref.)       | 1.11 (0.97, 1.26) | 1.01 (0.88, 1.16) | 0.90 (0.78, 1.04) | 0.79 (0.68, 0.91) | < 0.001                  |
| Multivariate-adjusted HR | 1.00 (Ref.)       | 1.18 (1.01, 1.37) | 1.14 (0.97, 1.37) | 1.11 (0.91, 1.35) | 1.05 (0.84, 1.33) | 0.91                     |
| <b>NHS I</b>             |                   |                   |                   |                   |                   |                          |
| Median (g/day)           | 15.3              | 18.1              | 20.0              | 22.0              | 25.4              |                          |
| Range                    | < 16.9            | 16.9, 19.0        | 19.1, 20.9        | 21.0, 23.3        | > 23.3            |                          |
| Cases                    | 325               | 274               | 253               | 260               | 219               |                          |
| Person-time              | 197,621           | 203,135           | 203,844           | 204,229           | 201,612           |                          |
| Age-adjusted HR          | 1.00 (Ref.)       | 0.81 (0.69, 0.95) | 0.76 (0.64, 0.90) | 0.78 (0.66, 0.92) | 0.68 (0.57, 0.80) | < 0.001                  |
| Multivariate-adjusted HR | 1.00 (Ref.)       | 0.86 (0.72, 1.03) | 0.87 (0.71, 1.06) | 0.96 (0.77, 1.19) | 0.89 (0.69, 1.16) | 0.69                     |
| <b>NHS II</b>            |                   |                   |                   |                   |                   |                          |
| Median (g/day)           | 16.7              | 19.9              | 22.0              | 24.4              | 28.4              |                          |
| Range                    | < 18.5            | 18.5, 21.0        | 21.1, 23.2        | 23.3, 25.9        | > 25.9            |                          |
| Cases                    | 723               | 616               | 630               | 542               | 503               |                          |
| Person-time              | 283,167           | 285,398           | 287,122           | 286,960           | 286,209           |                          |
| Age-adjusted HR          | 1.00 (Ref.)       | 0.85 (0.76, 0.95) | 0.87 (0.78, 0.97) | 0.75 (0.67, 0.84) | 0.70 (0.63, 0.79) | < 0.001                  |
| Multivariate-adjusted HR | 1.00 (Ref.)       | 0.94 (0.83, 1.07) | 1.05 (0.91, 1.20) | 0.98 (0.84, 1.14) | 1.02 (0.85, 1.22) | 0.64                     |
| <b>Pooled cohorts</b>    |                   |                   |                   |                   |                   |                          |
| Age-adjusted HR          | 1.00 (Ref.)       | 0.91 (0.76, 1.10) | 0.88 (0.76, 1.02) | 0.81 (0.72, 0.91) | 0.72 (0.66, 0.78) | < 0.001                  |
| Multivariate-adjusted HR | 1.00 (Ref.)       | 0.99 (0.83, 1.17) | 1.02 (0.88, 1.18) | 1.01 (0.93, 1.10) | 1.00 (0.88, 1.13) | 0.84                     |

Multivariate models adjusted for age, BMI, history of diabetes, history of hypertension, use of thiazides, supplemental calcium, intakes of fluid, sodium, potassium, fructose, oxalate, phytate, alcohol and for all the other sources of protein. Medians refer to the first time period; however dietary variables were updated over the course of the study.

**Supplementary Table 3. Quintiles of NEAP and risk of kidney stones**

|                              | <b>Quintile 1</b> | <b>Quintile 2</b> | <b>Quintile 3</b> | <b>Quintile 4</b> | <b>Quintile 5</b> | <b>p-value for trend</b> |
|------------------------------|-------------------|-------------------|-------------------|-------------------|-------------------|--------------------------|
| <b>HPFS</b>                  |                   |                   |                   |                   |                   |                          |
| Median (mEq/day)             | 30.0              | 38.3              | 44.6              | 51.6              | 63.8              |                          |
| Range                        | < 34.5            | 34.5, 41.3        | 41.4, 47.7        | 47.8, 55.9        | > 55.9            |                          |
| Cases                        | 257               | 319               | 359               | 452               | 576               |                          |
| Person-time                  | 132,320           | 132,966           | 133,850           | 135,554           | 135,985           |                          |
| Age-adjusted HR              | 1.00 (Ref.)       | 1.18 (1.00, 1.39) | 1.27 (1.08, 1.49) | 1.53 (1.31, 1.79) | 1.90 (1.63, 2.21) | < 0.001                  |
| Multivariate-adjusted HR (1) | 1.00 (Ref.)       | 1.20 (1.02, 1.43) | 1.29 (1.09, 1.53) | 1.50 (1.26, 1.77) | 1.74 (1.46, 2.08) | < 0.001                  |
| Multivariate-adjusted HR (2) | 1.00 (Ref.)       | 1.09 (0.91, 1.31) | 1.09 (0.89, 1.34) | 1.18 (0.94, 1.49) | 1.26 (0.96, 1.67) | 0.09                     |
| <b>NHS I</b>                 |                   |                   |                   |                   |                   |                          |
| Median (mEq/day)             | 28.0              | 35.4              | 41.1              | 47.6              | 58.3              |                          |
| Range                        | < 31.5            | 31.5, 37.7        | 37.8, 43.5        | 43.6, 51.1        | > 51.1            |                          |
| Cases                        | 193               | 222               | 223               | 321               | 372               |                          |
| Person-time                  | 201,927           | 202,014           | 202,137           | 202,072           | 202,291           |                          |
| Age-adjusted HR              | 1.00 (Ref.)       | 1.13 (0.93, 1.37) | 1.13 (0.93, 1.37) | 1.63 (1.35, 1.98) | 1.87 (1.55, 2.24) | < 0.001                  |
| Multivariate-adjusted HR (1) | 1.00 (Ref.)       | 1.11 (0.91, 1.35) | 1.07 (0.87, 1.31) | 1.47 (1.20, 1.79) | 1.55 (1.25, 1.92) | < 0.001                  |
| Multivariate-adjusted HR (2) | 1.00 (Ref.)       | 1.03 (0.83, 1.27) | 0.94 (0.73, 1.19) | 1.19 (0.91, 1.56) | 1.10 (0.79, 1.52) | 0.42                     |
| <b>NHS II</b>                |                   |                   |                   |                   |                   |                          |
| Median (mEq/day)             | 32.4              | 41.2              | 47.7              | 55.2              | 68.1              |                          |
| Range                        | < 37.2            | 37.2, 44.1        | 44.2, 50.8        | 50.9, 59.9        | > 59.9            |                          |
| Cases                        | 507               | 500               | 629               | 644               | 734               |                          |
| Person-time                  | 284,628           | 284,794           | 284,936           | 286,295           | 287,683           |                          |
| Age-adjusted HR              | 1.00 (Ref.)       | 1.00 (0.88, 1.13) | 1.28 (1.14, 1.44) | 1.35 (1.19, 1.51) | 1.58 (1.40, 1.78) | < 0.001                  |
| Multivariate-adjusted HR (1) | 1.00 (Ref.)       | 0.98 (0.86, 1.11) | 1.20 (1.06, 1.35) | 1.18 (1.04, 1.34) | 1.26 (1.10, 1.44) | < 0.001                  |
| Multivariate-adjusted HR (2) | 1.00 (Ref.)       | 0.96 (0.84, 1.11) | 1.19 (1.02, 1.38) | 1.17 (0.98, 1.39) | 1.24 (1.00, 1.53) | 0.04                     |
| <b>Pooled cohorts</b>        |                   |                   |                   |                   |                   |                          |
| Age-adjusted HR              | 1.00 (Ref.)       | 1.08 (0.97, 1.20) | 1.25 (1.15, 1.36) | 1.47 (1.31, 1.65) | 1.75 (1.55, 1.99) | < 0.001                  |
| Multivariate-adjusted HR (1) | 1.00 (Ref.)       | 1.08 (0.95, 1.23) | 1.20 (1.09, 1.31) | 1.36 (1.15, 1.60) | 1.49 (1.21, 1.84) | < 0.001                  |
| Multivariate-adjusted HR (2) | 1.00 (Ref.)       | 1.01 (0.92, 1.12) | 1.09 (0.96, 1.24) | 1.18 (1.07, 1.30) | 1.22 (1.05, 1.41) | 0.006                    |

Multivariate model 1 adjusted for age, BMI, history of diabetes, history of hypertension, use of thiazides, supplemental calcium, intakes of fluid, calcium, sodium, fructose, oxalate, phytate and alcohol. Multivariate model 2 further adjusted for all types of protein and potassium intake; in these models NEAP values represent interaction terms. Medians refer to the first time period; however dietary variables were updated over the course of the study.

**Supplementary Table 4. Pooled adjusted mean values and 95% confidence intervals of 24-h urine components by quintile of dairy protein**

|                | <b>Quintile 1</b><br><b>(n = 1,227)</b> | <b>Quintile 2</b><br><b>(n = 1,225)</b> | <b>Quintile 3</b><br><b>(n = 1,225)</b> | <b>Quintile 4</b><br><b>(n = 1,226)</b> | <b>Quintile 5</b><br><b>(n = 1,226)</b> | <b>p-value</b><br><b>for trend</b> |
|----------------|-----------------------------------------|-----------------------------------------|-----------------------------------------|-----------------------------------------|-----------------------------------------|------------------------------------|
| Median (g/day) | 5.6                                     | 10.0                                    | 13.1                                    | 17.3                                    | 25.6                                    | —                                  |
| Creatinine, g  | 1.4 (1.3, 1.4)                          | 1.3 (1.3, 1.4)                          | 1.3 (1.3, 1.4)                          | 1.3 (1.3, 1.3)                          | 1.3 (1.3, 1.4)                          | 0.09                               |
| Calcium, mg    | 180 (173, 187)                          | 185 (178, 191)                          | 195 (189, 202)                          | 195 (188, 202)                          | 204 (198, 211)                          | < 0.001                            |
| Oxalate, mg    | 34.1 (33.3, 34.9)                       | 33.0 (32.3, 33.8)                       | 33.0 (32.3, 33.8)                       | 32.9 (32.2, 33.7)                       | 32.7 (31.9, 33.5)                       | 0.011                              |
| Citrate, mg    | 675 (655, 696)                          | 674 (655, 694)                          | 703 (683, 722)                          | 706 (687, 726)                          | 711 (690, 731)                          | 0.002                              |
| Uric acid, mg  | 535 (526, 545)                          | 526 (517, 535)                          | 520 (511, 529)                          | 533 (523, 542)                          | 523 (514, 533)                          | 0.17                               |
| Sodium, mEq    | 145 (141, 149)                          | 151 (147, 154)                          | 148 (144, 152)                          | 152 (149, 156)                          | 151 (147, 155)                          | 0.021                              |
| Potassium, mEq | 61.8 (60.4, 63.1)                       | 63.5 (62.2, 64.8)                       | 63.6 (62.3, 65.0)                       | 65.2 (639, 66.2)                        | 66.0 (64.6, 67.4)                       | < 0.001                            |
| Magnesium, mg  | 107 (104, 110)                          | 106 (103, 108)                          | 109 (106, 112)                          | 111 (108, 113)                          | 111 (108, 114)                          | 0.001                              |
| Phosphate, mg  | 823 (807, 839)                          | 847 (832, 862)                          | 855 (840, 870)                          | 878 (863, 892)                          | 900 (884, 915)                          | < 0.001                            |
| Sulfate, mmol  | 18.0 (17.6, 18.4)                       | 18.4 (18.1, 18.8)                       | 18.7 (18.3, 19.0)                       | 19.3 (19.0, 19.7)                       | 19.6 (19.2, 20.0)                       | < 0.001                            |
| Ammonium, mmol | 28.7 (27.7, 29.7)                       | 29.5 (28.5, 30.4)                       | 29.7 (28.8, 30.6)                       | 29.3 (28.4, 30.2)                       | 29.4 (28.4, 30.3)                       | 0.56                               |
| pH, U          | 6.05 (6.02, 6.09)                       | 6.02 (5.99, 6.05)                       | 6.02 (5.99, 6.06)                       | 6.03 (6.00, 6.07)                       | 6.01 (5.98, 6.05)                       | 0.10                               |
| Volume, mL     | 1,833<br>(1,783, 1,883)                 | 1,842<br>(1,794, 1,890)                 | 1,862<br>(1,814, 1,910)                 | 1,905<br>(1,857, 1,953)                 | 1,830<br>(1,780, 1,883)                 | 0.80                               |
| SS CaOx        |                                         |                                         |                                         |                                         |                                         |                                    |
| - Pharmacal    | 1.62 (1.46, 1.79)                       | 1.52 (1.36, 1.68)                       | 1.61 (1.45, 1.77)                       | 1.54 (1.38, 1.70)                       | 1.63 (1.46, 1.79)                       | 0.91                               |
| - Litholink    | 5.22 (4.89, 5.54)                       | 5.37 (5.07, 5.68)                       | 5.58 (5.28, 5.88)                       | 5.39 (5.09, 5.69)                       | 5.65 (5.34, 5.96)                       | 0.08                               |
| SS CaP         |                                         |                                         |                                         |                                         |                                         |                                    |
| - Pharmacal    | 1.35 (1.17, 1.53)                       | 1.31 (1.13, 1.49)                       | 1.37 (1.19, 1.55)                       | 1.37 (1.19, 1.55)                       | 1.51 (1.32, 1.69)                       | 0.016                              |
| - Litholink    | 1.02 (0.92, 1.11)                       | 0.99 (0.90, 1.08)                       | 1.11 (1.02, 1.20)                       | 1.12 (1.03, 1.21)                       | 1.18 (1.09, 1.27)                       | 0.003                              |
| SS UA          |                                         |                                         |                                         |                                         |                                         |                                    |
| - Pharmacal    | 1.74 (1.50, 1.98)                       | 1.74 (1.50, 1.98)                       | 1.78 (1.54, 2.02)                       | 1.73 (1.49, 1.97)                       | 1.75 (1.51, 2.00)                       | 0.89                               |
| - Litholink    | 0.66 (0.58, 0.73)                       | 0.71 (0.65, 0.78)                       | 0.67 (0.60, 0.73)                       | 0.69 (0.62, 0.75)                       | 0.68 (0.61, 0.75)                       | 0.86                               |

Models adjusted for age, BMI, history of kidney stones, history of diabetes, history of hypertension, total fluid intake, use of thiazides, supplemental calcium, intake of all the other types of protein, intake of potassium, study cohort, urine creatinine and sodium. Ammonium data only available for NHS II Litholink collection. CaOx, calcium oxalate; CaP, calcium phosphate (brushite); SS, supersaturation; UA, uric acid.

Pharmacal results are reported as relative supersaturations, whereas Litholink results as supersaturations. Medians refer to the first time period; however dietary variables were updated over the course of the study.

**Supplementary Table 5. Pooled adjusted mean values and 95% confidence intervals of 24-h urine components by quintile of non-dairy animal protein**

|                | <b>Quintile 1<br/>(n = 1,225)</b> | <b>Quintile 2<br/>(n = 1,227)</b> | <b>Quintile 3<br/>(n = 1,225)</b> | <b>Quintile 4<br/>(n = 1,227)</b> | <b>Quintile 5<br/>(n = 1,225)</b> | <b>p-value<br/>for trend</b> |
|----------------|-----------------------------------|-----------------------------------|-----------------------------------|-----------------------------------|-----------------------------------|------------------------------|
| Median (g/day) | 24.3                              | 33.8                              | 41.3                              | 49.1                              | 64.7                              | —                            |
| Creatinine, g  | 1.3 (1.3, 1.4)                    | 1.3 (1.3, 1.4)                    | 1.3 (1.3, 1.4)                    | 1.3 (1.3, 1.4)                    | 1.3 (1.3, 1.4)                    | 0.26                         |
| Calcium, mg    | 187 (181, 194)                    | 193 (187, 200)                    | 192 (186, 198)                    | 192 (185, 198)                    | 195 (189, 202)                    | 0.11                         |
| Oxalate, mg    | 33.3 (32.5, 34.1)                 | 32.9 (32.2, 33.7)                 | 32.9 (32.1, 33.6)                 | 32.8 (32.1, 33.5)                 | 33.8 (33.1, 34.6)                 | 0.29                         |
| Citrate, mg    | 720 (700, 740)                    | 696 (676, 716)                    | 707 (687, 726)                    | 680 (661, 699)                    | 666 (646, 686)                    | < 0.001                      |
| Uric acid, mg  | 514 (505, 524)                    | 525 (515, 534)                    | 525 (515, 534)                    | 537 (527, 546)                    | 538 (528, 547)                    | < 0.001                      |
| Sodium, mEq    | 141 (138, 145)                    | 147 (143, 151)                    | 152 (148, 156)                    | 150 (146, 154)                    | 156 (153, 160)                    | < 0.001                      |
| Potassium, mEq | 65.8 (64.4, 67.1)                 | 64.6 (63.2, 65.9)                 | 63.5 (62.2, 64.8)                 | 63.3 (62.0, 64.6)                 | 62.9 (61.6, 64.3)                 | < 0.001                      |
| Magnesium, mg  | 112 (109, 115)                    | 109 (106, 111)                    | 107 (104, 109)                    | 107 (104, 109)                    | 110 (107, 112)                    | 0.12                         |
| Phosphate, mg  | 845 (829, 860)                    | 856 (841, 87)                     | 846 (832, 861)                    | 872 (857, 886)                    | 883 (868, 898)                    | < 0.001                      |
| Sulfate, mmol  | 17.8 (17.4, 18.2)                 | 18.5 (18.1, 18.9)                 | 18.6 (18.2, 18.9)                 | 19.1 (18.8, 19.5)                 | 20.1 (19.7, 20.4)                 | < 0.001                      |
| Ammonium, mmol | 28.3 (27.4, 29.2)                 | 29.3 (28.4, 30.2)                 | 28.4 (27.5, 29.3)                 | 30.2 (29.3, 31.1)                 | 30.3 (29.4, 31.3)                 | < 0.001                      |
| pH, U          | 6.09 (6.05, 6.12)                 | 6.05 (6.02, 6.09)                 | 6.05 (6.02, 6.08)                 | 6.00 (5.96, 6.03)                 | 5.96 (5.92, 5.99)                 | < 0.001                      |
| Volume, mL     | 1,869<br>(1,820, 1,918)           | 1,839<br>(1,791, 1,888)           | 1,851<br>(1,803, 1,899)           | 1,840<br>(1,793, 1,887)           | 1,873<br>(1,825, 1,922)           | 0.89                         |
| SS CaOx        |                                   |                                   |                                   |                                   |                                   |                              |
| - Pharmacal    | 1.57 (1.40, 1.73)                 | 1.60 (1.43, 1.76)                 | 1.55 (1.39, 1.71)                 | 1.58 (1.42, 1.74)                 | 1.63 (1.46, 1.79)                 | 0.42                         |
| - Litholink    | 5.18 (4.88, 5.48)                 | 5.42 (5.12, 5.71)                 | 5.56 (5.27, 5.84)                 | 5.50 (5.20, 5.81)                 | 5.56 (5.23, 5.48)                 | 0.08                         |
| SS CaP         |                                   |                                   |                                   |                                   |                                   |                              |
| - Pharmacal    | 1.47 (1.29, 1.65)                 | 1.49 (1.31, 1.67)                 | 1.33 (1.15, 1.50)                 | 1.31 (1.13, 1.49)                 | 1.31 (1.13, 1.49)                 | 0.001                        |
| - Litholink    | 1.04 (0.95, 1.13)                 | 1.10 (1.01, 1.18)                 | 1.16 (1.07, 1.24)                 | 1.10 (1.01, 1.19)                 | 1.02 (0.93, 1.11)                 | 0.70                         |
| SS UA          |                                   |                                   |                                   |                                   |                                   |                              |
| - Pharmacal    | 1.61 (1.37, 1.85)                 | 1.60 (1.36, 1.84)                 | 1.71 (1.47, 1.95)                 | 1.87 (1.63, 2.11)                 | 1.95 (1.71, 2.20)                 | < 0.001                      |
| - Litholink    | 0.61 (0.55, 0.68)                 | 0.71 (0.65, 0.78)                 | 0.65 (0.59, 0.72)                 | 0.69 (0.62, 0.76)                 | 0.74 (0.67, 0.81)                 | 0.02                         |

Models adjusted for age, BMI, history of kidney stones, history of diabetes, history of hypertension, total fluid intake, use of thiazides, supplemental calcium, intake of all the other types of protein, intake of potassium, study cohort, urine creatinine and sodium. Ammonium data only available for NHS II Litholink collection. CaOx, calcium oxalate; CaP, calcium phosphate (brushite); SS, supersaturation; UA, uric acid.

Pharmacal results are reported as relative supersaturations, whereas Litholink results as supersaturations. Medians refer to the first time period; however dietary variables were updated over the course of the study.



**Supplementary Table 6. Pooled adjusted mean values and 95% confidence intervals of 24-h urine components by quintile of animal protein to potassium ratio**

|                | <b>Quintile 1<br/>(n = 1,225)</b> | <b>Quintile 2<br/>(n = 1,227)</b> | <b>Quintile 3<br/>(n = 1,225)</b> | <b>Quintile 4<br/>(n = 1,227)</b> | <b>Quintile 5<br/>(n = 1,225)</b> | <b>p-value<br/>for trend</b> |
|----------------|-----------------------------------|-----------------------------------|-----------------------------------|-----------------------------------|-----------------------------------|------------------------------|
| Median (g/mEq) | 0.43                              | 0.57                              | 0.66                              | 0.77                              | 0.97                              | —                            |
| Creatinine, g  | 1.4 (1.3, 1.4)                    | 1.3 (1.3, 1.4)                    | 1.3 (1.3, 1.4)                    | 1.3 (1.3, 1.4)                    | 1.3 (1.3, 1.3)                    | 0.19                         |
| Calcium, mg    | 192 (183, 202)                    | 191 (184, 198)                    | 192 (185, 198)                    | 193 (186, 200)                    | 192 (182, 201)                    | 0.87                         |
| Oxalate, mg    | 33.7 (32.6, 34.8)                 | 33.4 (32.6, 34.2)                 | 32.7 (32.0, 33.5)                 | 32.6 (31.8, 33.5)                 | 33.5 (32.4, 34.6)                 | 0.85                         |
| Citrate, mg    | 730 (701, 760)                    | 715 (693, 737)                    | 680 (660, 700)                    | 691 (669, 713)                    | 660 (632, 689)                    | 0.003                        |
| Uric acid, mg  | 531 (517, 545)                    | 529 (519, 539)                    | 528 (519, 537)                    | 523 (513, 534)                    | 526 (513, 540)                    | 0.53                         |
| Sodium, mEq    | 147 (141, 153)                    | 150 (146, 154)                    | 149 (145, 153)                    | 149 (145, 153)                    | 151 (146, 157)                    | 0.46                         |
| Potassium, mEq | 68.0 (66.0, 70.0)                 | 66.5 (65.0, 68.0)                 | 64.3 (62.9, 65.6)                 | 62.6 (61.1, 64.1)                 | 59.1 (57.2, 61.0)                 | < 0.001                      |
| Magnesium, mg  | 115 (111, 119)                    | 110 (107, 113)                    | 107 (104, 109)                    | 106 (103, 109)                    | 107 (103, 110)                    | 0.041                        |
| Phosphate, mg  | 859 (836, 881)                    | 861 (844, 877)                    | 866 (851, 881)                    | 854 (837, 871)                    | 866 (844, 888)                    | 0.84                         |
| Sulfate, mmol  | 18.7 (18.1, 19.2)                 | 18.9 (18.5, 19.3)                 | 18.9 (18.5, 19.3)                 | 18.6 (18.2, 19.0)                 | 19.0 (18.5, 19.5)                 | 0.57                         |
| Ammonium, mmol | 28.7 (27.2, 30.1)                 | 28.5 (27.5, 29.5)                 | 29.3 (28.5, 30.2)                 | 29.3 (28.3, 30.2)                 | 30.9 (29.4, 32.4)                 | 0.06                         |
| pH, U          | 6.11 (6.06, 6.16)                 | 6.07 (6.04, 6.11)                 | 6.02 (5.99, 6.06)                 | 5.99 (5.96, 6.03)                 | 5.95 (5.90, 6.00)                 | < 0.001                      |
| Volume, mL     | 1,932<br>(1,859, 2,004)           | 1,888<br>(1,835, 1,941)           | 1,833<br>(1,785, 1,881)           | 1,838<br>(1,785, 1,891)           | 1,792<br>(1,722, 2,004)           | 0.05                         |
| SS CaOx        |                                   |                                   |                                   |                                   |                                   |                              |
| - Pharmacal    | 1.62 (1.43, 1.82)                 | 1.63 (1.46, 1.80)                 | 1.56 (1.39, 1.72)                 | 1.52 (.35, 1.68)                  | 1.61 (1.43, 1.80)                 | 0.99                         |
| - Litholink    | 4.96 (4.49, 5.44)                 | 5.28 (4.96, 5.61)                 | 5.65 (5.36, 5.95)                 | 5.69 (5.35, 6.02)                 | 5.66 (5.18, 6.15)                 | 0.12                         |
| SS CaP         |                                   |                                   |                                   |                                   |                                   |                              |
| - Pharmacal    | 1.45 (1.23, 1.67)                 | 1.44 (1.25, 1.63)                 | 1.44 (1.25, 1.62)                 | 1.30 (1.12, 1.48)                 | 1.29 (1.08, 1.49)                 | 0.09                         |
| - Litholink    | 1.08 (0.94, 1.22)                 | 1.15 (1.05, 1.24)                 | 1.12 (1.04, 1.21)                 | 1.07 (0.97, 1.17)                 | 1.02 (0.88, 1.16)                 | 0.42                         |
| SS UA          |                                   |                                   |                                   |                                   |                                   |                              |
| - Pharmacal    | 1.70 (1.41, 2.00)                 | 1.67 (1.42, 1.93)                 | 1.72 (1.47, 1.96)                 | 1.77 (1.52, 2.02)                 | 1.90 (1.62, 2.18)                 | 0.11                         |
| - Litholink    | 0.53 (0.42, 0.63)                 | 0.58 (0.51, 0.65)                 | 0.70 (0.64, 0.77)                 | 0.74 (0.66, 0.81)                 | 0.85 (0.74, 0.95)                 | < 0.001                      |

Models adjusted for age, BMI, history of kidney stones, history of diabetes, history of hypertension, total fluid intake, use of thiazides, supplemental calcium, intake of protein and potassium, study cohort, urine creatinine and sodium. Ammonium data only available for NHS II Litholink collection. CaOx, calcium oxalate; CaP, calcium phosphate (brushite); SS, supersaturation; UA, uric acid. Pharmacal results are

reported as relative supersaturations, whereas Litholink results as supersaturations. Medians refer to the first time period; however dietary variables were updated over the course of the study.
